# Supplementary material
Source: PubMed Central journal article supplement (PMC4507356)
Supplement: Supp_Figure1.pdf [file Supp_Figure1.pdf]

## Supplementary Data

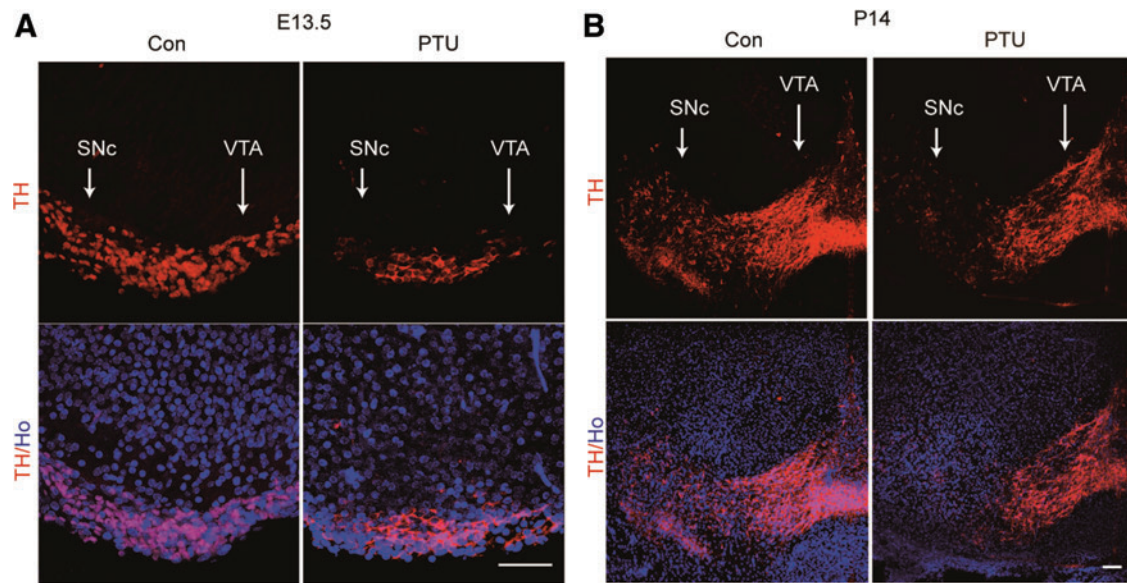

**SUPPLEMENTARY FIG. S1.** Tyrosine hydroxylase (TH) staining in the midbrain of E13.5 and P14 mice. **(A)** Representative confocal images of TH staining in the midbrain of E13.5 mice from six independent experiments [ventral tegmental area (VTA) and substantia nigra pars compacta (SNc)]. **(B)** Representative images of TH staining of P14 mice from six independent experiments (VTA and SNc). Scale bar: 50  $\mu$ m.
