# Supplementary material
Source: PubMed Central journal article supplement (PMC4507356)
Supplement: Supp_Figure2.pdf [file Supp_Figure2.pdf]

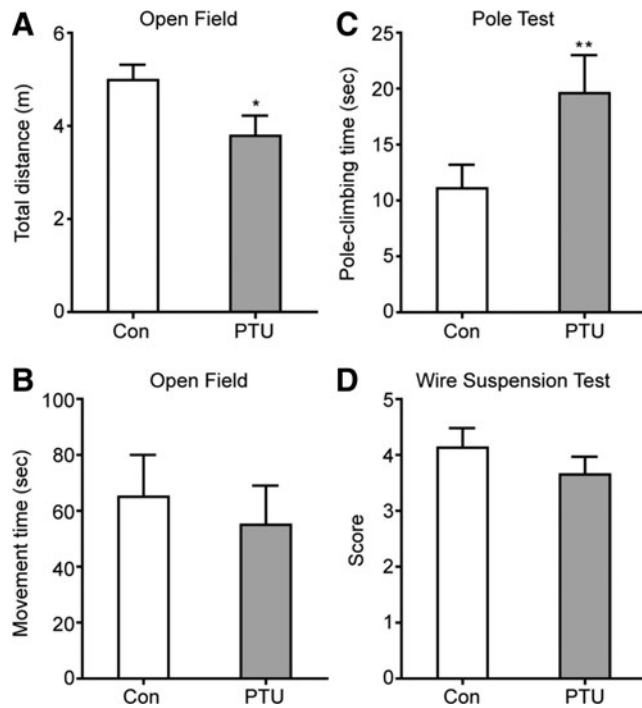

**SUPPLEMENTARY FIG. S2.** Motor functions of the offspring at the 2-month-old age. **(A, B)** Total distance and movement time in the open field test. The offspring of propyl-thio-uracil (PTU)-treated mice moved a shorter total distance than control mice. **(C)** The offspring of PTU-treated mice spent a much longer time to descend the pole in the pole climbing test. **(D)** The score assigned in the wire suspension test. For all experiments, data are presented as the mean  $\pm$  standard error of mean (SEM).  $n=12$ , Student's  $t$ -test, \* $P < 0.05$ , \*\* $P < 0.01$ .
