# Supplementary material
Source: PubMed Central journal article supplement (PMC4507356)
Supplement: Supp_Figure3.pdf [file Supp_Figure3.pdf]

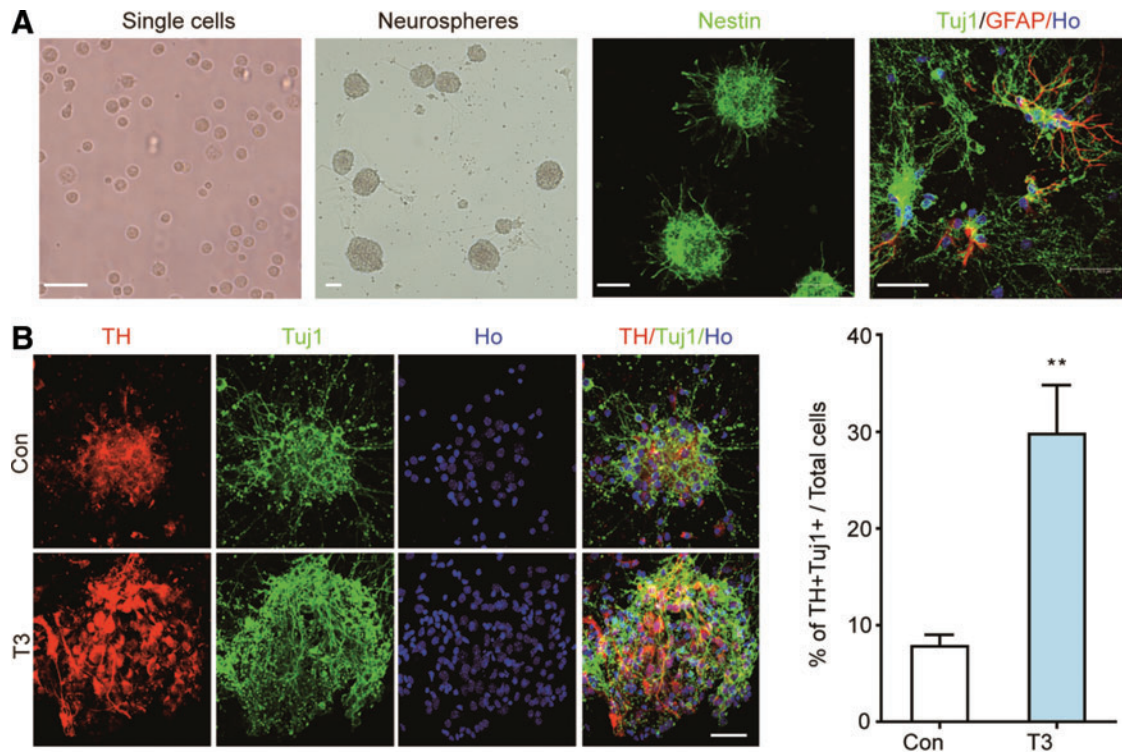

**SUPPLEMENTARY FIG. S3.** Embryonic ventral midbrain neuronal stem cell (VM NSC) culture, identification, and T3-induced differentiation. **(A)** VM NSC culture and identification. The isolated single cells formed neurospheres 6 days in vitro. The cultured cells were Nestin positive and can differentiate into Tuj1<sup>+</sup> and GFAP<sup>+</sup> cells in vitro. Scale bar: 50  $\mu$ m. **(B, C)** T3 promotes dopamine (DA) neuron differentiation from cultured neurospheres. VM neurospheres were treated with 0.3 nM T3 and induced differentiation for 6 days in vitro. The differentiated DA neurons were identified by staining with TH and Tuj1 antibodies. Images in **(B)** are representative of four independent experiments (scale bar: 50  $\mu$ m), and the graph in **(C)** represents the statistical results. Data are presented as the mean  $\pm$  SEM.  $n=4$ , Student's  $t$ -test, \*\* $P<0.01$ .
