# Supplementary material
Source: PubMed Central journal article supplement (PMC4507356)
Supplement: Supp_Figure4.pdf [file Supp_Figure4.pdf]

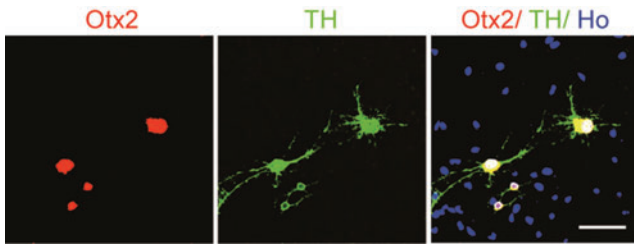

**SUPPLEMENTARY FIG. S4.** Otx2 is expressed in T3-induced NSC-differentiated TH<sup>+</sup> cells in vitro. Scale bar: 50  $\mu$ m.
