# Supplementary material
Source: PubMed Central journal article supplement (PMC4507356)
Supplement: Supp_Figure5.pdf [file Supp_Figure5.pdf]

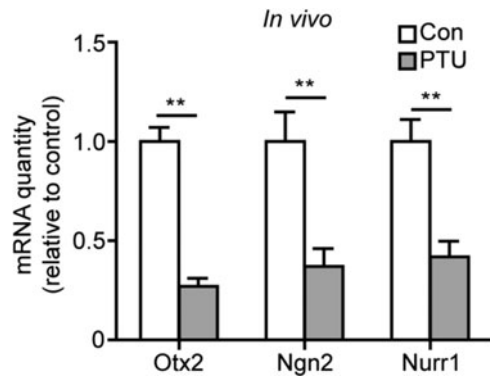

**SUPPLEMENTARY FIG. S5.** Hypothyroidism during pregnancy decreases the mRNA expression of Otx2, Ngn2, and Nurr1. Pregnant mice were treated with PTU as indicated. The mRNA expression of Otx2, Ngn2, and Nurr1 was detected in the midbrain of embryos at E13.5. Data are presented as the mean  $\pm$  SEM.  $n=4$ , Student's  $t$ -test,  $**P<0.01$ .
