# Supplementary material
Source: PubMed Central journal article supplement (PMC4507356)
Supplement: Supp_Figure6.pdf [file Supp_Figure6.pdf]

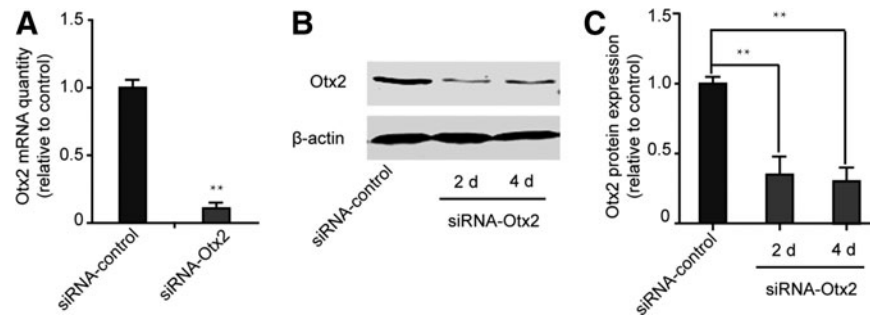

**SUPPLEMENTARY FIG. S6.** The efficiency Otx2 RNA interference. **(A)** The mRNA expression of Otx2 after Otx2-siRNA transfected for 2 days.  $n=4$ , Student's  $t$ -test,  $**P<0.01$ . **(B, C)** The protein expression of Otx2 after Otx2-siRNA treated for 2 and 4 days.  $n=4$ , one-way ANOVA followed by Fisher's post hoc test,  $**P<0.01$ . For all experiments, data are presented as the mean  $\pm$  SEM.
