# Supplementary material
Source: PubMed Central journal article supplement (PMC4507356)
Supplement: Supp_Figure7.pdf [file Supp_Figure7.pdf]

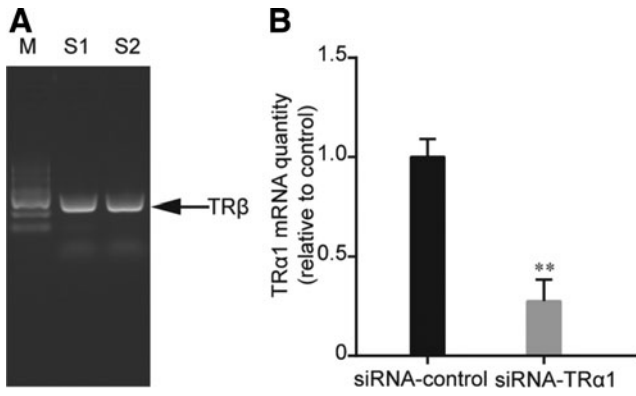

**SUPPLEMENTARY FIG. S7.** Positive control of the thyroid hormone receptor (TR) $\beta$  mRNA expression and the efficiency TR $\alpha$ 1 RNA interference. **(A)** mRNA expression of TR $\beta$  in mouse liver tissues, which serves as a positive control of TR $\beta$  mRNA expression. M, maker; S1, mouse liver tissue sample 1; S2, mouse liver tissue sample 2. Primers used for reverse transcription-polymerase chain reaction: TR $\beta$  fwd 5'-aaaagcaaggactctgacttgg-3' and rev 5'-ggatggagactttctgaatgg-3'. **(B)** The mRNA expression of TR $\alpha$ 1 after TR $\alpha$ 1-siRNA transfected for 2 days.  $n=4$ , Student's  $t$ -test,  $**P<0.01$ .
