# Supplementary material
Source: PubMed Central journal article supplement (PMC4507356)
Supplement: Supp_Table1.pdf [file Supp_Table1.pdf]

SUPPLEMENTARY TABLE S1. SERUM FT3 AND FT4 LEVEL OF PREGNANT MICE AND THE OFFSPRING (NG/ML)

|     | <i>Maternal</i> |                          |                |                          | <i>Offspring</i> |             |
|-----|-----------------|--------------------------|----------------|--------------------------|------------------|-------------|
|     | <i>E13.5</i>    |                          | <i>E21</i>     |                          | <i>P14</i>       |             |
|     | <i>Control</i>  | <i>PTU</i>               | <i>Control</i> | <i>PTU</i>               | <i>Control</i>   | <i>PTU</i>  |
| FT3 | 2.51 ± 0.49     | 1.43 ± 0.38 <sup>a</sup> | 2.98 ± 0.37    | 0.35 ± 0.11 <sup>b</sup> | 2.17 ± 0.47      | 2.13 ± 0.56 |
| FT4 | 2.52 ± 0.55     | 0.56 ± 0.35 <sup>b</sup> | 3.26 ± 0.69    | 0.29 ± 0.08 <sup>b</sup> | 2.35 ± 0.61      | 2.48 ± 0.39 |

Data are presented as the mean ± standard error of mean.  
*n* = 12, <sup>a</sup>*P* < 0.05, <sup>b</sup>*P* < 0.01 compared with the control group, Student's *t*-test.  
 PTU, propyl-thio-uracil.
